# Supplementary material for: Effect of the Application of Ultrasound to Homogenize Milk and the Subsequent Pasteurization by Pulsed Electric Field, High Hydrostatic Pressure, and Microwaves
Source: MDPI journal article supplement (doi:10.3390/foods12071457), 2023-03-29
Supplement: s1 [file s1]

## Supplementary material

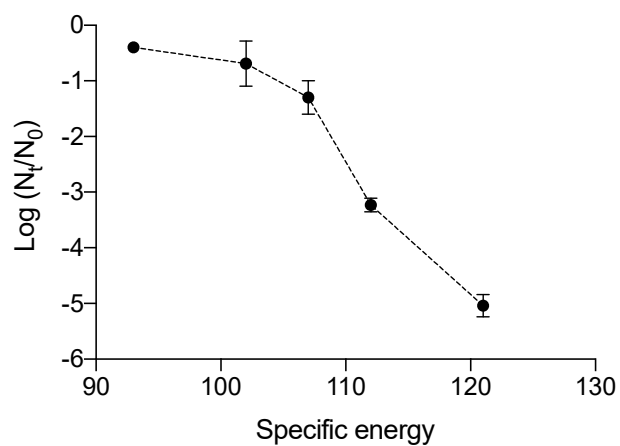

**Figure S1.** Inactivation of *Listeria monocytogenes* STCC 5672 in milk when applying a PEF treatment of 20 kV/cm and different specific energies (from 90 to 120 kJ/kg).
